# Supplementary material for: Reevaluation of an Established In Vivo Gastric Vessel Bleed Model for Hemostatic Device Safety and Efficacy Testing
Source: Preprints.org preprint supplement (doi:10.20944/preprints202410.2578.v1), 2024-10-31
Supplement: Supplementary file 1 [file supplementary]

**Fig S1:**

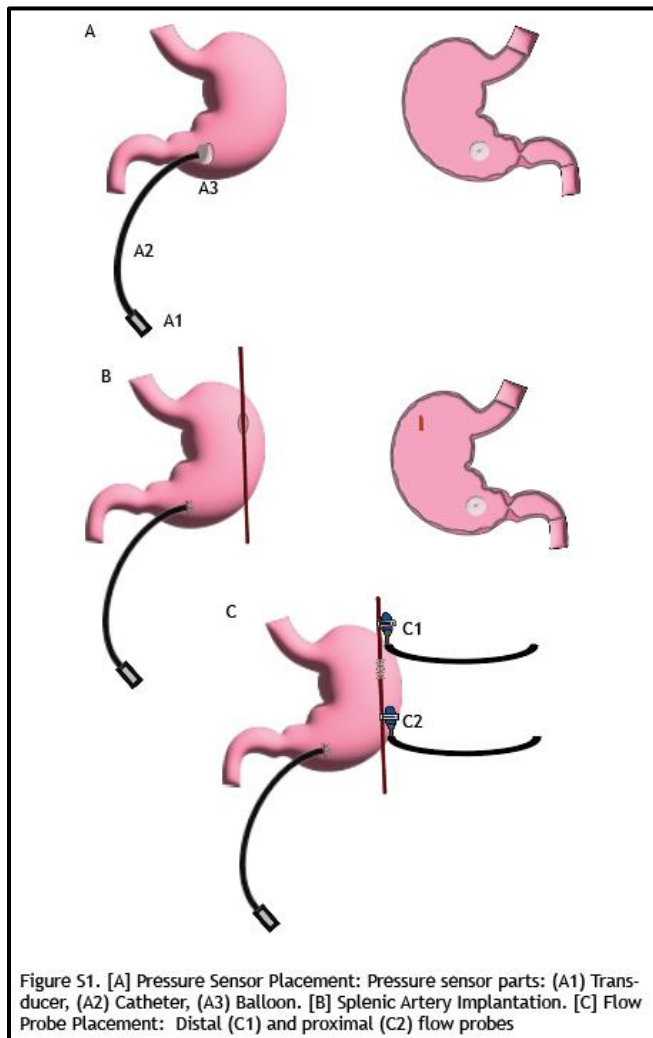

Fig S2:

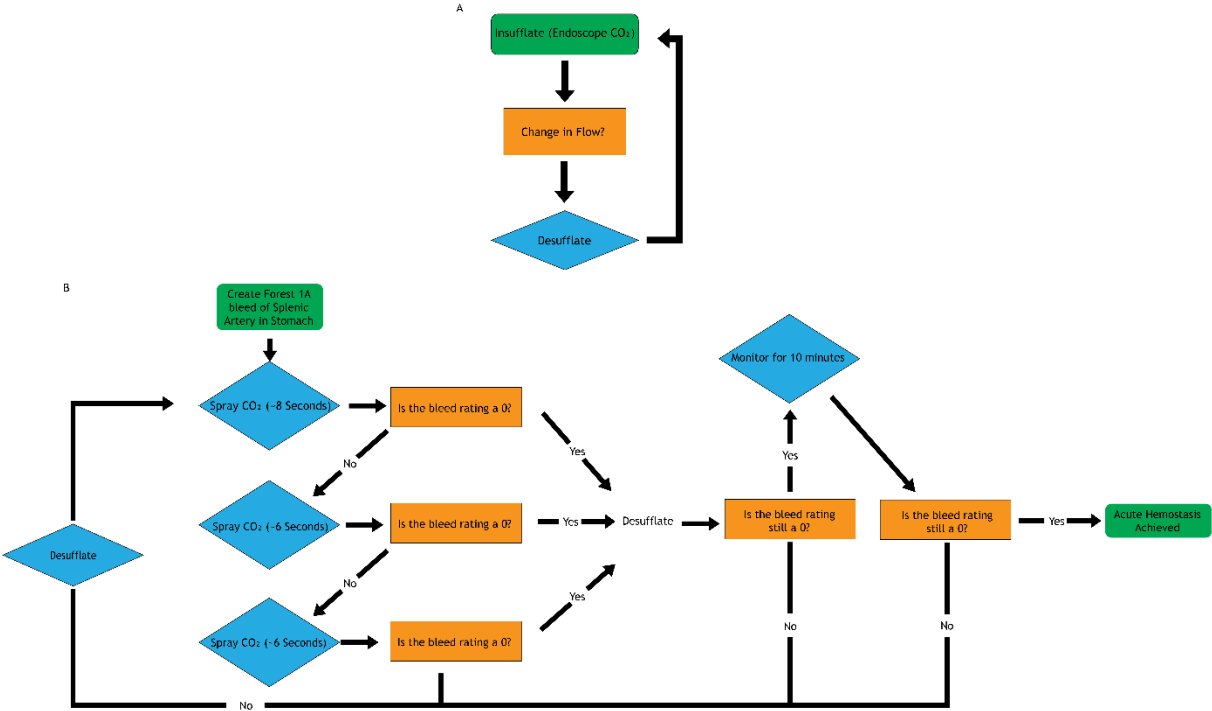

Figure S2: [A] Pre-puncture cycling to evaluate pressure impact on vessel. [B] Post-puncture pressure cycling to simulate hemostatic powder application without powder. This flow chart utilizes a spray cycle of 8-6-6 seconds.

Fig S3:

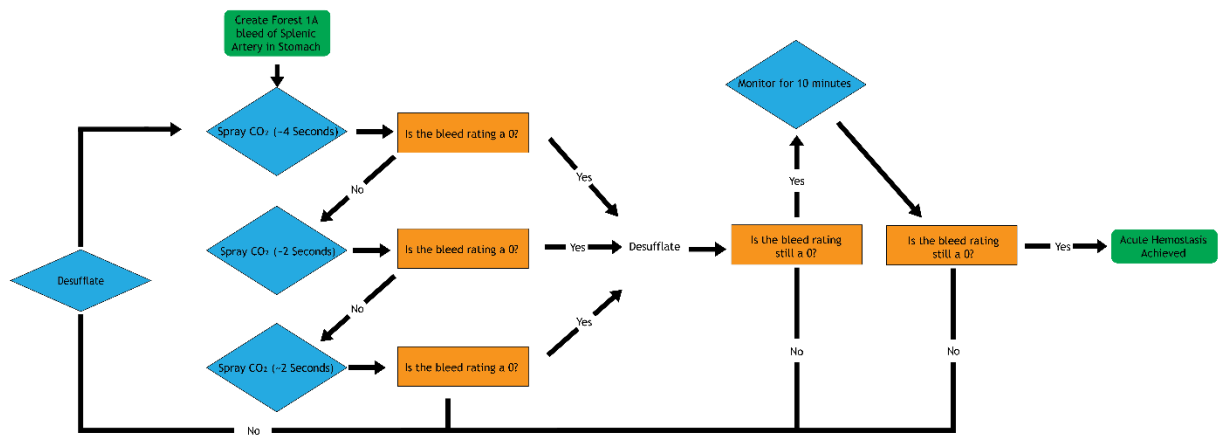

Figure S3: Post-puncture pressure cycling to simulate hemostatic powder application without powder application. This flow chart utilizes a spray cycle of 4-2-2- seconds.

**Fig S4:**

|                    |             |                      |                 |            |                  |
|--------------------|-------------|----------------------|-----------------|------------|------------------|
| Forrest Scale      | 0           | Forrest 1b           | Forrest 1b      | Forrest 1a | Forrest 1a       |
| Experimental Scale | 0           | 1                    | 2               | 3          | 4                |
| Bleed Description  | No bleeding | Slow oozing leak-age | Moderate oozing | Spurting   | Extreme Spurting |

Figure S4: Forrest bleeding scale as it relates to the bleed scale called out during the experiment.
